# Supplementary material for: In search of nonlipogenic ABCA1 inducers (NLAI): precision coregulator TR-FRET identifies diverse signatures for LXR ligands
Source: eLife journal article supplement (doi:10.7554/elife.109146), 2025-11-25
Supplement: fig2-figsupp1-data1 [file elife-109146-fig2-figsupp1-data1-v1.pdf]

Figure 2-figure supplement 1-source data 1. Summary of NR Panel Parameters

| Lanthascreen                        |                      |                       |
|-------------------------------------|----------------------|-----------------------|
| Receptor                            | Coactivator/Acceptor | Donor                 |
| <i>FXR</i>                          | SRC2-2-fluorescein   | $\alpha$ -GST-Terbium |
| <i>PXR</i>                          | SRC1-4-fluorescein   | $\alpha$ -GST-Terbium |
| <i>PPAR<math>\delta</math></i>      | C33-fluorescein      | $\alpha$ -GST-Terbium |
| <i>RXR<math>\alpha/\beta</math></i> | D22-fluorescein      | $\alpha$ -GST-Terbium |
| <i>RAR<math>\alpha</math></i>       | D22-fluorescein      | $\alpha$ -GST-Terbium |
| <i>RAR<math>\beta</math></i>        | SRC2-2-fluorescein   | $\alpha$ -GST-Terbium |
