# Supplementary material for: In search of nonlipogenic ABCA1 inducers (NLAI): precision coregulator TR-FRET identifies diverse signatures for LXR ligands
Source: eLife journal article supplement (doi:10.7554/elife.109146), 2025-11-25
Supplement: fig2-figsupp1-data2 [file elife-109146-fig2-figsupp1-data2-v1.pdf]

**Figure 2-figure supplement 1-source data 2. Coregulator Peptide Sequences**

| Vendor            | Catalog No. | Coregulator           | Sequence                                 | MW (Da.) |
|-------------------|-------------|-----------------------|------------------------------------------|----------|
| Anaspec           | AS-62152    | SRC1-btn              | Biotin-<br>CPSSHSSLTERHKILHRLQLQEGSPS    | 3026.6   |
| Thermo<br>Fischer | PV4386      | FL-D22                | Fluorescein-<br>LPYEGSLLLKLLRAPVEEV      | 2499     |
| Thermo<br>Fischer | PV4549      | FL-<br>TRAP220/DRIP-1 | Fluorescein-<br>NTKNHPMLMNULLKDNPAQD     | 2554     |
| Thermo<br>Fischer | PV4582      | FL-SRC1-4             | Fluorescein-<br>GPQTPQAQQKSLQLLQTE       | 2465.9   |
| Thermo<br>Fischer | PV4586      | FL-SRC2-2             | Fluorescein-<br>LKEKHKILHRLQLQDSSSPV     | 2585     |
| Thermo<br>Fischer | PV4421      | FL-PGC1a              | Fluorescein-<br>EAEEPSLLKLLAPANTQ        | 2424     |
| Thermo<br>Fischer | PV4606      | FL-C33                | Fluorescein-<br>HVEMHPLLMLLMESQWGA       | 2539     |
| Thermo<br>Fischer | PV4624      | FL-NCOR ID2           | Fluorescein-<br>DPASNLGLEDIIRKALMGSFDDK  | 2865     |
| Thermo<br>Fischer | PV4423      | FL-SMRT ID2           | Fluorescein -<br>HASTNMGLEAIIRKALMGKYDQW | 2993     |
